# Supplementary material for: Nursing Home Implementation of Health Information Technology: Review of the Literature Finds Inadequate Investment in Preparation, Infrastructure, and Training
Source: PubMed Central journal article supplement — Inquiry. 2018 Jun 11;55:0046958018778902. doi: 10.1177/0046958018778902 (PMC6050994; doi:10.1177/0046958018778902), 2018-06-11
Supplement: INQ-17-0300.Supplemental_Material.Revision.pdf [file INQ-17-0300.Supplemental_Material.Revision.pdf]

## **Appendix**

### **I. Literature Review: Databases and Detailed Search Strategy**

#### ***Search Engine: Pubmed***

(health information management[MeSH Terms]) AND nursing homes[MeSH terms]

((Computerized Physician Order Entry (CPOE)) AND nursing homes[MeSH terms])

((computerized electronic prescribing) AND nursing homes[MeSH terms])

((computerized electronic risk management) AND nursing homes[MeSH terms])

((computerized electronic MDS) AND nursing homes[MeSH terms])

((computerized electronic communication) AND nursing homes[MeSH terms])

((computerized decision support) AND nursing homes[MeSH terms])

((electronic health record[MeSH Terms]) AND nursing homes[MeSH Terms]) AND health personnel[MeSH Terms]

((electronic health record[MeSH Terms]) AND nursing homes[MeSH Terms]) AND personnel management[MeSH Terms]

((electronic health record[MeSH Terms]) AND nursing homes[MeSH Terms]) AND job description

((electronic health record[MeSH Terms]) AND nursing homes[MeSH Terms]) AND nursing education

#### ***Search Engine: CINAHL***

(MH "Information Technology") AND (MH "Nursing Homes")

(MH "health information systems") AND (MH "Nursing Homes")

(MH "Computerized Patient Record") AND (MH "Nursing Homes")

(MH "Electronic Data Interchange") AND (MH "Nursing Homes")

(MH "health information systems") AND (MH "Nursing Home Personnel")

***Search Engine: PsychINFO***

su(Exact("information technology") ) AND su.Exact("nursing homes")

su.Exact("electronic communication") AND su.Exact("nursing homes")

su.Exact("computer applications") AND su.Exact("nursing homes")

***Search Engine: Google Scholar***

health information technology "nursing homes" personnel

"information technology" "nursing homes" personnel

"electronic health record" "nursing homes" personnel

computerized electronic technology ("physician order entry" OR "medication management" OR "Prescribing" OR "incident reporting" OR "MDS" OR "decision support") "nursing homes" workforce turnover staffing

***Search Engine: Web of Science***

("information technology" OR "electronic health record") AND TOPIC: ("nursing homes") AND TOPIC: (personnel OR workforce OR staffing)

("information technology" OR "electronic health record" OR "computerized physician order entry") AND TOPIC: ("nursing homes") AND TOPIC: (personnel OR workforce OR staffing OR turnover OR retention OR training OR manpower)

1. Literature Review Flow Diagram for Study Identification and Selection

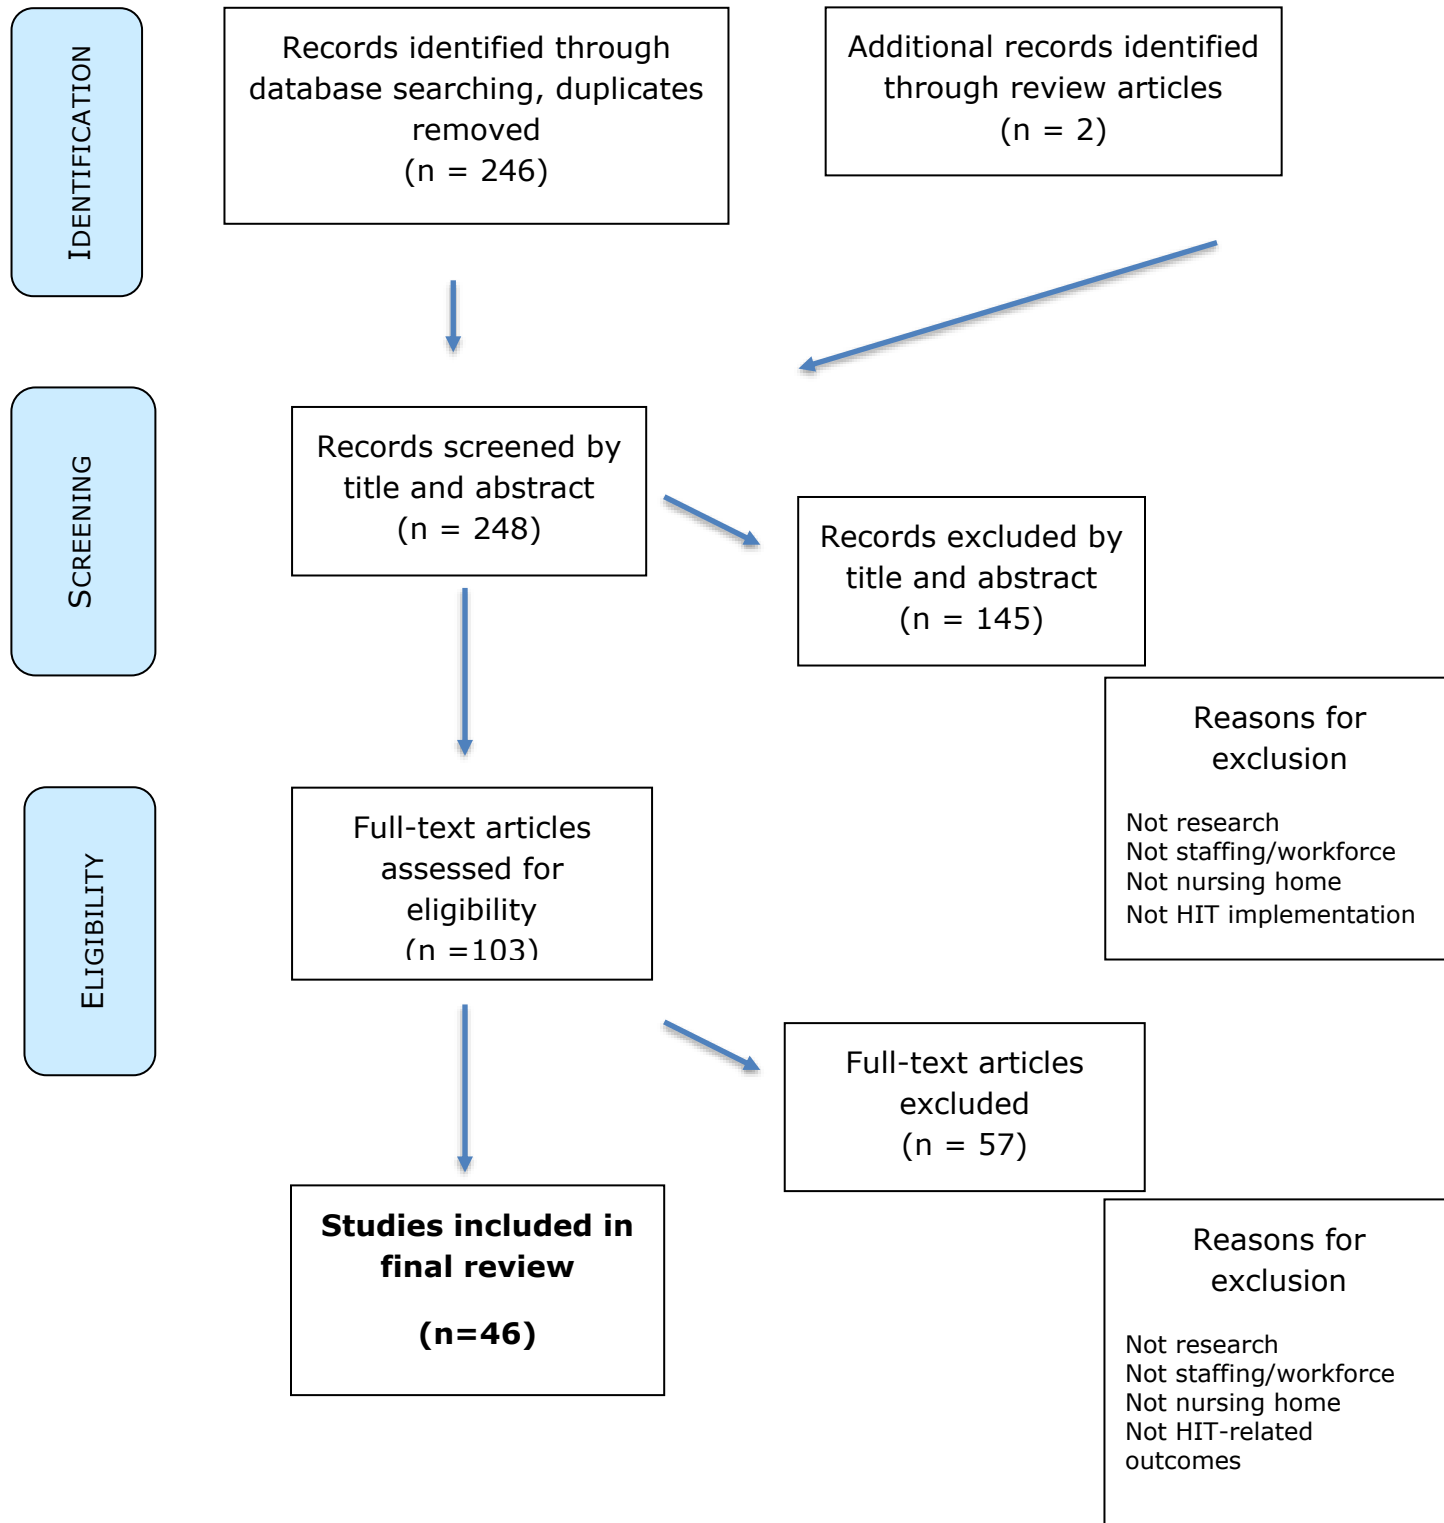



**Table 1. Studies examining the impact of Health Information Technologies on staff in nursing homes**

| Author, Year                      | HIT                                                                                                | Study Design                                                                                             | Setting, Population                                                   | Methods                                                                                                                                                                              | Findings                                                                                                                                                                       |                                                                                                   |                                                                                          |                                                                                                                                        |
|-----------------------------------|----------------------------------------------------------------------------------------------------|----------------------------------------------------------------------------------------------------------|-----------------------------------------------------------------------|--------------------------------------------------------------------------------------------------------------------------------------------------------------------------------------|--------------------------------------------------------------------------------------------------------------------------------------------------------------------------------|---------------------------------------------------------------------------------------------------|------------------------------------------------------------------------------------------|----------------------------------------------------------------------------------------------------------------------------------------|
|                                   |                                                                                                    |                                                                                                          |                                                                       |                                                                                                                                                                                      | Implementation                                                                                                                                                                 | Staffing                                                                                          | Productivity                                                                             | Quality of care                                                                                                                        |
| <b>Experimental Studies</b>       |                                                                                                    |                                                                                                          |                                                                       |                                                                                                                                                                                      |                                                                                                                                                                                |                                                                                                   |                                                                                          |                                                                                                                                        |
| Wagner, L. (2005)                 | Menu Driven Incident Report System (MDIRS): documented on paper and entered into electronic record | Randomized controlled trial: intervention (3NH) and control (3NH) groups at baseline and 1-4 months post | 6 NH, Georgia, staff and leadership (not specified)                   | Mixed methods: Descriptive statistics from facility incident reports; Attended or reviewed minutes from facility QI team meetings; Collected feedback from staff nurses, and leaders | Pilot-testing of instrument, in-service training and nurse feedback; collaboration with developer to create intervention; computer problems limited implementation in one site | 1 intervention NH: high turnover, overload of duties, multiple absences, resulting in limited use | No difficulty in completing MDIRS; improved communication                                | No significant difference in fall incidence; greater completion of documentation on near falls and circumstances in intervention group |
| <b>Quasi-Experimental Studies</b> |                                                                                                    |                                                                                                          |                                                                       |                                                                                                                                                                                      |                                                                                                                                                                                |                                                                                                   |                                                                                          |                                                                                                                                        |
| Engstrom, M. (2005)               | Alarm sensors, assault alarms, and EHR                                                             | Intervention (2 units), comparison (2 units), 6-, 12-months post                                         | 4 units of NH in Sweden, RNs/LPNs/Auxiliary nurses (I: N=17; C: N=16) | Surveys: t-tests/Fisher's exact, repeated-measures ANOVA                                                                                                                             |                                                                                                                                                                                | Intervention: higher satisfaction and motivation relative to baseline                             | Intervention: improved documentation, increased workload, no difference in communication | Intervention: perceived quality of care scale increased at 12 months                                                                   |

|                      |      |                                                                                               |                                                                                                                                                                                                          |                                                                                                                   |                                                                                                                                                                  |                                                                                                                                      |                                                                                                                                                     |
|----------------------|------|-----------------------------------------------------------------------------------------------|----------------------------------------------------------------------------------------------------------------------------------------------------------------------------------------------------------|-------------------------------------------------------------------------------------------------------------------|------------------------------------------------------------------------------------------------------------------------------------------------------------------|--------------------------------------------------------------------------------------------------------------------------------------|-----------------------------------------------------------------------------------------------------------------------------------------------------|
| Fossum, M.<br>(2013) | CDSS | Intervention 1<br>(4NH),<br>Intervention 2<br>(7NH),<br>Comparison<br>(4NH), 2 years<br>post- | 15 NH in<br>Norway,<br>RNs/CNAs, NH<br>residents;<br>(N=150 pre-;<br>N=141 post-)                                                                                                                        | Repeated cross-<br>section of<br>intervention and<br>comparison groups;<br>Descriptive<br>statistics and<br>ANOVA | 4 nurses involved in<br>CDSS<br>development, 3-day<br>training for "super<br>users"; IT support<br>in training; two 45<br>min sessions for all<br>other RNs/CNAs |                                                                                                                                      | No significant<br>difference in the<br>prevalence of<br>pressure ulcers or<br>malnutrition                                                          |
| Kruger, K.<br>(2011) | CDSS | Pre-post: 2 years;<br>Provider and staff<br>satisfaction: Post-<br>only                       | 3 NH in<br>Norway,<br>Satisfaction:<br>Physicians,<br>nurses, assistant<br>nurses,<br>physiotherapists<br>(N=272);<br>Clinical<br>outcomes:<br>nursing home<br>residents<br>(N=513 pre-;<br>N=183 post-) | Surveys: descriptive<br>statistics; Clinical<br>outcomes: chi-<br>square and one-way<br>ANOVA                     |                                                                                                                                                                  | 67% report CDSS<br>less time<br>consuming; 90% of<br>documentation<br>requirements met;<br>72% agreed<br>reminders<br>supported work | Decreased<br>%patients taking<br>neuroleptics,<br>warfarin, patients<br>not weighed for last<br>30 days. Perceived<br>improved<br>medication safety |

|                  |                                                     |                                                                                                                                                                       |                                                                             |                                                                                                                                          |                                                                                                                                                                                                                                                                                                                                                                                                                                                                                                         |                                                                                                               |                                                                                                                                                                                                                                                                                                                                                                                                                                                                                                                       |                                                                                                                                                                                                                                                                           |
|------------------|-----------------------------------------------------|-----------------------------------------------------------------------------------------------------------------------------------------------------------------------|-----------------------------------------------------------------------------|------------------------------------------------------------------------------------------------------------------------------------------|---------------------------------------------------------------------------------------------------------------------------------------------------------------------------------------------------------------------------------------------------------------------------------------------------------------------------------------------------------------------------------------------------------------------------------------------------------------------------------------------------------|---------------------------------------------------------------------------------------------------------------|-----------------------------------------------------------------------------------------------------------------------------------------------------------------------------------------------------------------------------------------------------------------------------------------------------------------------------------------------------------------------------------------------------------------------------------------------------------------------------------------------------------------------|---------------------------------------------------------------------------------------------------------------------------------------------------------------------------------------------------------------------------------------------------------------------------|
| Rantz, M. (2006) | POC, EHR, nurse clinical quality improvement expert | Intervention 1(4 NH): EHR + nurse expert; Intervention 2 (4 NH): EHR only); Intervention 3 (5 NH): nurse expert only; Comparison (5 NH): neither, 1 and 2 years post- | 18 NH: 14 in Missouri, 4 in other states; DON, staff and residents (N=8166) | Descriptive statistics: means, medians, from MDS, costs, staffing reports; I1 only: Interviews (N=130), focus groups, direct observation | I1: Satisfaction up from 6-12 months; 24 months: happy with technology<br><br>Frustrations: Limited IT support after hours, vendor lack of follow-up and poor responsiveness, staff attempts to troubleshoot by themselves<br><br>Training: insufficient, need ongoing, refresher, specific individual; Nurse mentors helpful; CNAs w/ limited literacy, English proficiency more difficulties using HIT<br><br>Adoption: Review of several systems before selection<br><br>Equipment: unreliable, slow | I1-I3: Increase in sense of team, shared values<br><br>I1: Improved communication betw staff and w physicians | I1: Documentation errors due to system losses, user errors, continued use of paper: too time consuming, ignoring alerts/messages<br><br>24 months: improved documentation and time decreased<br><br>RNs/LPNs: assessments too long, not flexible,<br><br>CNAs: reduced time for patient care, increased monitoring “big brother” vs evidence of work,<br><br>Workarounds: Document before care given, double doc w/ paper, use “quick notes” rather than standard form-inconsistent and not synced with clinical info | I1, I2 have worse scores at baseline bc of improved documentation of problems; Most improvement in I1<br><br>I1: Staff report improved quality of care, easier access to information, more thorough assessments, clearer picture of resident conditions, better follow-up |
|------------------|-----------------------------------------------------|-----------------------------------------------------------------------------------------------------------------------------------------------------------------------|-----------------------------------------------------------------------------|------------------------------------------------------------------------------------------------------------------------------------------|---------------------------------------------------------------------------------------------------------------------------------------------------------------------------------------------------------------------------------------------------------------------------------------------------------------------------------------------------------------------------------------------------------------------------------------------------------------------------------------------------------|---------------------------------------------------------------------------------------------------------------|-----------------------------------------------------------------------------------------------------------------------------------------------------------------------------------------------------------------------------------------------------------------------------------------------------------------------------------------------------------------------------------------------------------------------------------------------------------------------------------------------------------------------|---------------------------------------------------------------------------------------------------------------------------------------------------------------------------------------------------------------------------------------------------------------------------|

|                                   |                                                        |                                                                                                                                                                             |                                                                        |                                                                                                                                         |                                                                                                                                                                     |                                                                                                                                             |                                                                                                |                                                                                                                                                                                                 |
|-----------------------------------|--------------------------------------------------------|-----------------------------------------------------------------------------------------------------------------------------------------------------------------------------|------------------------------------------------------------------------|-----------------------------------------------------------------------------------------------------------------------------------------|---------------------------------------------------------------------------------------------------------------------------------------------------------------------|---------------------------------------------------------------------------------------------------------------------------------------------|------------------------------------------------------------------------------------------------|-------------------------------------------------------------------------------------------------------------------------------------------------------------------------------------------------|
| Rantz, M. (2010)<br>*same as 2006 | Bedside EHR, nurse clinical quality improvement expert | Intervention 1(4 NH): EHR + nurse expert;<br>Intervention 2 (4 NH): EHR only);<br>Intervention 3 (5 NH): nurse expert only; Comparison (5 NH): neither, 1 and 2 years post- | 18 NH: 14 in Missouri, 4 in other states; staff and residents (N=8166) | Descriptive statistics of costs, staffing totals and mix, staff turnover; no statistical analysis of intervention vs. comparison groups |                                                                                                                                                                     | I1: increased staff hours and costs per resident, total hours per day unchanged<br>No stat signif differences in turnover across all groups | I1: 24 months: all staff report jobs easier                                                    | I1, I2: improved in late-loss ADLs; I1-I3 improved behavioral symptoms and pressure sores; I1 improved delirium, depression<br>Overall more quality indicators with no change than with changes |
| Yu, P. (2008)                     | EHR, POC                                               | Intervention (1 NH), Comparison (1 NH), Post-only: survey (5 weeks), interviews (5, 11 weeks)                                                                               | 2 NH in Australia; RNs, EENs, PCWs, AINs (N=24)                        | Survey (response rate I: 82%, C: 43%) calculated means, Mann-Whitney to detect differences between groups; Semi-structured interviews   | Training: 2.5 days for RNs/EENs, 1.5 days PCWs/AINs, 1 day for support staff; Staff at both sites supportive of computers and HIT; satisfied with training, support | Intervention: staff reported continued need for training, instruction, practice                                                             | Intervention: staff significantly more satisfied with speed, legibility, accessing information |                                                                                                                                                                                                 |

**Longitudinal Observational Studies**

**Pre-/Post-**



|                       |                                         |                                                                 |                                                                                                                                              |                                                                                                          |                                                                                                                                           |                                                   |                                                          |                                                          |
|-----------------------|-----------------------------------------|-----------------------------------------------------------------|----------------------------------------------------------------------------------------------------------------------------------------------|----------------------------------------------------------------------------------------------------------|-------------------------------------------------------------------------------------------------------------------------------------------|---------------------------------------------------|----------------------------------------------------------|----------------------------------------------------------|
| Alexander, G. (2015a) | HIE with hospital                       | Longitudinal observation of implementation process over 2 years | 16 NH in St. Louis, MO area; Direct observation: Licensed clinicians and direct care staff (N=38); Interviews: Staff, administrators (N=230) | Readiness assessments, structured observation (2-3 hour periods; day shifts); Semi-structured interviews | Little/no integration of resident care technologies with external entities; None had onsite IT support                                    | Concerns about lack of equipment at point of care | Non-emergent resident care mostly communicated via paper | Workarounds not secure for protecting health information |
| Brandeis, G. (2007)   | HIE with hospital, including shared EHR | Longitudinal observation of implementation process over 2 years | 11 NH in Boston, MA area; Physicians, nursing home staff, NH N not described                                                                 | Case study: direct observation, methods for NH assessment not described                                  | Difficulty in adaptation of hospital EHR to NH needs; NH had limited internet access, none had wi-fi; NH staff did not have access to EHR |                                                   | All NH used paper                                        |                                                          |

|                            |      |                               |                                                                 |                                                             |                                                         |                                                                                                                                                                                             |                                                                              |                                                                                                                                                                                    |                                                                                                                                                                           |
|----------------------------|------|-------------------------------|-----------------------------------------------------------------|-------------------------------------------------------------|---------------------------------------------------------|---------------------------------------------------------------------------------------------------------------------------------------------------------------------------------------------|------------------------------------------------------------------------------|------------------------------------------------------------------------------------------------------------------------------------------------------------------------------------|---------------------------------------------------------------------------------------------------------------------------------------------------------------------------|
| Cherry, B.<br>(2011)       | EHR  | 6 months pre-, 9 months post  | 1 NH in Texas, RNs/LVNs (N=20)                                  | Direct observation: day and evening shifts; process mapping |                                                         |                                                                                                                                                                                             |                                                                              |                                                                                                                                                                                    | Decline in workflow steps for most processes; Majority of steps still paper-based; Faster access to information; Allows multiple staff members to work on chart at a time |
| Colón-Emeric, C.<br>(2009) | CPOE | Pre- 1 month, post: 12 months | 2 VA NH in North Carolina, MDs/NPs/PAs (N=8), residents (N=265) | Descriptive statistics: Clinical data; Provider surveys     | CPOE algorithms developed with multidisciplinary panel; | Report easy to use, improved communication, useful for training new staff in one site<br>Provider turnover >100% and understaffing in one site: default to verbal orders, bypass algorithms | Reduced order time<br>Workarounds: Verbal communication for acute conditions | Falls reduced 10%<br>Used for falls: Perceived improvement in quality of care, reminders of guidelines<br><br>Other CPOE not used: User interface failures to direct to algorithms |                                                                                                                                                                           |

|                      |             |                                  |                                                                                                                                                          |                                                                                                                                                                                                 |                                                                                                                                                                                                                                                                                                                                                                                           |                                                                                                                                                                                                                                                            |                                                                                                                                                                                                                                                                                                             |                                                                                                                     |
|----------------------|-------------|----------------------------------|----------------------------------------------------------------------------------------------------------------------------------------------------------|-------------------------------------------------------------------------------------------------------------------------------------------------------------------------------------------------|-------------------------------------------------------------------------------------------------------------------------------------------------------------------------------------------------------------------------------------------------------------------------------------------------------------------------------------------------------------------------------------------|------------------------------------------------------------------------------------------------------------------------------------------------------------------------------------------------------------------------------------------------------------|-------------------------------------------------------------------------------------------------------------------------------------------------------------------------------------------------------------------------------------------------------------------------------------------------------------|---------------------------------------------------------------------------------------------------------------------|
| Galani, M.<br>(2015) | EHR         | Baseline, 6 months, 2 years post | 2 NH in Australia; RNs/EENs/PCW, other)<br>Interviews: N=30; Usability study: N=24, 12 experienced; selected at random from list stratified by expertise | Structured interviews; Direct observation video, measured task times, mouse clicks and keyboard strokes, errors; Self-administered surveys); Descriptive statistics, two-way ANOVA, correlation | Training: 30 min individual sessions; Superusers -1 wk onsite with vendor; Add'l single function sessions after start; New staff-ad-hoc training; 50+% reported training met their needs; 43% rated computer skills "below average"/ "poor"; 23% computer experience as "minimal"/"none"; 73% reported easy to use; 47% not enough training time; Satisfied IT support except after hours | Dissatisfaction peaked at 6 mos, lower at 2 years w/ return to paper; Experienced users: lower mental load, worked more efficiently, completed more tasks and made fewer errors; Inexperienced users: mostly PCWs, still having difficulties at 12+ months | Reduced steps and saved time: 87% satisfied with documentation; Easier to access data, more efficient; Improved communication; Challenges: difficulty timely completion of documentation, network constraints, power outages, system crashes, interface design, not enough computers or space for computers | 40%: EHR not helpful for care decision; 2 years' post, reported enhanced continuity of care through better tracking |
| Hustey, F.<br>(2012) | HIE with ED | Baseline, 8 months post          | NH and ED in a larger healthcare system in US; NH physicians, nurses (N=26 pre-, N=23 post-) ED physicians, nurses                                       | Surveys and utilization data: frequencies and tabulations of responses                                                                                                                          | NH training: Too difficult to schedule, optional multi-hour session for assistant nurse managers and unit secretaries; NH MDs not involved; New staff training ad hoc; NH medical director changed 3x                                                                                                                                                                                     |                                                                                                                                                                                                                                                            | 8 months post-: 40% of transitions used HIE: Excessive time to scan information into the network, information transfer prevents computer use for other functions                                                                                                                                            |                                                                                                                     |

-delayed  
implementation

Munysisia, E. EHR  
(2014)

2 months pre-, 3,  
6, 12, 23 months  
post: 2009-2011

1 RACH in  
Australia;  
RNs/EENs/PC  
Ws (N=242)

Work sampling  
technique: Direct  
observation, 5  
morning shifts, per  
period; q9 minutes,  
65-68 rounds per  
study day; Pearson  
chi-square of  
change in  
proportion of time  
spent on activities  
pre-/post-

Training: all staff  
30 min individual;  
continuous training  
by other staff or  
NH IT support;  
Leaders concerned  
length of time for  
nursing staff to  
learn EHR might  
interfere with duties

RNs: At 23 months:  
reduced oral  
communication,  
increased  
documentation  
time; EENs:  
documentation time  
reduced; PCWs:  
reduced oral  
communication at  
12 months, return  
to baseline at 23  
months; reverse for  
documentation

No significant  
changes in time  
spent on direct care,  
medication  
management,  
personal activities,  
in-transit time

Munyisia, E. EHR  
(2011)

3 months pre-, 6,  
18, 31 months  
post): 2007-2009;  
Post-only (20  
months)

1 NH in  
Australia;  
RNs/EENs/PC  
Ws (Survey  
N=32 pre-,  
N=25 post-6-18  
months, 15 post-  
31 months);  
Structured  
interviews  
(N=17)

Survey: descriptive  
statistics and non-  
parametric tests;  
Interviews: methods  
not described

Training: Super  
users identified by  
basic skills test, 1  
week training from  
vendor, then trained  
rest of staff one-on-  
one; EHR  
introduced over  
months only to  
nurses: PCWs  
progress notes only,  
paper assessments  
entered by someone  
else until finally all  
EHR at 31 months

No change in  
communication;  
Improvement in  
legibility, accessing  
information, reduce  
repetition: PCWs  
more positive than  
RNs/EENs;

Improvement in  
perceived  
information quality  
and completeness  
of documentation at  
31 months;  
Managers report  
better monitoring,  
oversight,  
identifying ongoing  
training needs;  
Nurses: no change  
in perceived quality  
of care,  
understanding  
problems, decision-  
making

Munysisia, E. EHR  
(2013)

2 months pre-, 3,  
6, 12, 23 months  
post): 2009-2011  
(work sampling);  
Post-only (6-, 12-  
months post,  
structured  
interviews)

1 RACH in  
Australia,  
PCWs/  
recreational  
activity officers  
(RAOs) (N=109  
observations;  
N=8 staff for  
interviews)

Work sampling  
technique: Direct  
observation, 5  
morning shifts, per  
period; observations  
made q5 minutes;  
Pearson chi-square  
of change in  
proportion of time  
spent on activities  
pre-/post-;  
Structured  
interview: content  
analysis

Training: one-on-  
one 30 min  
sessions; new  
employees trained  
by other staff or IT  
support officer

Preferred verbal  
communication;  
Perceived increase  
in time, required  
more steps in EHR;  
PCW: time on  
direct care work  
reduced/  
documentation  
increased at 3-6  
months, returned to  
baseline at 23  
months; Increased  
time spent on  
personal duties;  
Decreased time on  
medication  
management; RAO:  
decreased time on  
communication,  
increased time in  
transit

PCWs: ease of  
access to the  
records  
significantly  
improved  
completion after  
implementation

|                            |      |                                          |                                                               |                                                                                                           |                                                                                                                                                                                                                                                                                                           |                                                                                                                                                                     |                                                                                                                                                                                             |                                                                                              |
|----------------------------|------|------------------------------------------|---------------------------------------------------------------|-----------------------------------------------------------------------------------------------------------|-----------------------------------------------------------------------------------------------------------------------------------------------------------------------------------------------------------------------------------------------------------------------------------------------------------|---------------------------------------------------------------------------------------------------------------------------------------------------------------------|---------------------------------------------------------------------------------------------------------------------------------------------------------------------------------------------|----------------------------------------------------------------------------------------------|
| Qian, S. (2015)            | eMAR | Baseline through 12 months post          | 2 RACH units in Australia, “medication staff” (nurses) (N=7)  | Time motion observation, informal conversations, document review, field notes                             |                                                                                                                                                                                                                                                                                                           | No signif change in documentation time<br>Signif reduction in time spent on locating/reading records<br>No net improvement in efficiency                            | Documentation compliance improved                                                                                                                                                           |                                                                                              |
| Scott-Cawiezell, J. (2009) | eMAR | Baseline, 3, 6, 9 months post: 2003-2007 | 5 NH in Midwest; RN/LPN/CMT (certified medication technician) | Focus groups, direct observations of medication passes, frequencies and tabulations of medication records | <p>           QI teams led implementation, education, met monthly to discuss progress and challenges, establish blame-free environment to facilitate discussion; eMAR information provided feedback reports; rapid-cycle QI approach to implementation; Offered incentives to report errors;         </p> | <p>           CMTs accustomed to punitive culture for late (rather than incorrect) meds: worked to change culture and incorporate more input from CMTs         </p> | <p>           Improved medication management: legibility, faster access to information<br/><br/>           Workarounds: Skipping or checking boxes without actual confirmation         </p> | <p>           Safety improvements: alerts and signaling features reduced errors         </p> |

|                    |                               |                                       |                                                                                |                                                                                                                                                                                                    |                                                                                                                                                                                                                                                                                                       |
|--------------------|-------------------------------|---------------------------------------|--------------------------------------------------------------------------------|----------------------------------------------------------------------------------------------------------------------------------------------------------------------------------------------------|-------------------------------------------------------------------------------------------------------------------------------------------------------------------------------------------------------------------------------------------------------------------------------------------------------|
| Sharkey, S. (2013) | Combined CDSS/QI intervention | Baseline, 9-15 months post: 2010-2011 | 14 NH in Washington, DC, Administrators, DON, CNAs, dietitians, nurse managers | NH characteristics obtained from NH leadership, data from CMS Nursing Home Compare; Observations of team participation levels with level of implementation, Spearman rank correlation coefficients | QI facilitator: training, worked with CNAs to redesign workflows, weekly support phone calls; factors associated w/ implementation: high involvement from DON, nurse managers and in house dietitian, team lead, and staff educator; openness to redesign; HIT support (full time), internal champion |
|--------------------|-------------------------------|---------------------------------------|--------------------------------------------------------------------------------|----------------------------------------------------------------------------------------------------------------------------------------------------------------------------------------------------|-------------------------------------------------------------------------------------------------------------------------------------------------------------------------------------------------------------------------------------------------------------------------------------------------------|

|                        |           |                                                                              |                                    |                                                                                                                               |                                                                                                                       |                                                                                                  |                                                                                                                                                                                                                                    |
|------------------------|-----------|------------------------------------------------------------------------------|------------------------------------|-------------------------------------------------------------------------------------------------------------------------------|-----------------------------------------------------------------------------------------------------------------------|--------------------------------------------------------------------------------------------------|------------------------------------------------------------------------------------------------------------------------------------------------------------------------------------------------------------------------------------|
| Vogelsmeier, A. (2008) | eMAR, EHR | Longitudinal observation of implementation process from baseline to 6 months | 5 NH in Midwest, staff unspecified | Direct observation, workflow process mapping, key informant interviews, document review of medication safety team field notes | Inadequate equipment, slow wi-fi connections, processes should have been re-engineered to fit new system but were not | Workarounds: use of handwritten notes, verbal communication; inefficient and changes in workflow | Workarounds for safety blocks: Entering multiple doses of the same medication instead of discussing the excess ordered dose; skipped steps or documented all steps at once, rather than before and after medication administration |
|------------------------|-----------|------------------------------------------------------------------------------|------------------------------------|-------------------------------------------------------------------------------------------------------------------------------|-----------------------------------------------------------------------------------------------------------------------|--------------------------------------------------------------------------------------------------|------------------------------------------------------------------------------------------------------------------------------------------------------------------------------------------------------------------------------------|



|                   |             |                             |                                                         |                                                              |                                                                                                                                                                                                                                                                 |                                                                                             |                                                                                    |
|-------------------|-------------|-----------------------------|---------------------------------------------------------|--------------------------------------------------------------|-----------------------------------------------------------------------------------------------------------------------------------------------------------------------------------------------------------------------------------------------------------------|---------------------------------------------------------------------------------------------|------------------------------------------------------------------------------------|
| Zamora, Z. (2012) | HIE with ED | 9 months pre, 9 months post | 4 NHs in North Carolina, nursing home staff unspecified | Methods for data collection and analysis on NH not described | Training: length not described, including education and practice cases, laminated manuals; weekly to biweekly visits to NH; Research team 1 month "prime" the system involved calling NH to complete referrals and return notes; Basic computer skills training | High staff turnover (near complete every 6 months) led to inadequate training and awareness | Too few computers and limited access to computers; incompatibility with NH systems |
|-------------------|-------------|-----------------------------|---------------------------------------------------------|--------------------------------------------------------------|-----------------------------------------------------------------------------------------------------------------------------------------------------------------------------------------------------------------------------------------------------------------|---------------------------------------------------------------------------------------------|------------------------------------------------------------------------------------|

**Post-only**

|                      |      |                    |                                                  |                                                                                        |  |  |                                                                                                                          |
|----------------------|------|--------------------|--------------------------------------------------|----------------------------------------------------------------------------------------|--|--|--------------------------------------------------------------------------------------------------------------------------|
| Alexander, G. (2005) | CDSS | 6-, 12-months post | 3 NH in Missouri, 98-240 beds, staff unspecified | Estimated correlations between clinical alerts and staff responses using data from EHR |  |  | No significant difference between alert activity and clinical actions; no change in CNA task lists in response to alerts |
|----------------------|------|--------------------|--------------------------------------------------|----------------------------------------------------------------------------------------|--|--|--------------------------------------------------------------------------------------------------------------------------|

|                      |          |                               |                                                                            |                                                                                                                                                           |                                                                                                                                                                                                                                                                                                |                                                                                                                                                                                                                                                                                                           |                                                                                                                                                                                                                 |
|----------------------|----------|-------------------------------|----------------------------------------------------------------------------|-----------------------------------------------------------------------------------------------------------------------------------------------------------|------------------------------------------------------------------------------------------------------------------------------------------------------------------------------------------------------------------------------------------------------------------------------------------------|-----------------------------------------------------------------------------------------------------------------------------------------------------------------------------------------------------------------------------------------------------------------------------------------------------------|-----------------------------------------------------------------------------------------------------------------------------------------------------------------------------------------------------------------|
| Alexander, G. (2014) | HIT      | 6 months post                 | 5 NH in Missouri high IT, CNA/LPN/RN, wound nurses: 35 focus groups: N=137 | Direct observation: interactions and communications; Focus groups; Correlations between level of IT, interactions and centrality of communication network |                                                                                                                                                                                                                                                                                                | High IT negatively correlated with unique staff interactions; Improved teamwork between physicians, licensed staff, and certified staff                                                                                                                                                                   | High IT easily accessible, improves decision-making process and greater collaboration; standardization allowed for better monitoring                                                                            |
| Alexander, G. (2007) | EHR, POC | Post-only, time not specified | 4 NH in Midwest; RN/LPN/CNA (N=120)                                        | Focus groups (22), direct observation                                                                                                                     | Dedicated training space and partial implementation: whole system startup "overwhelming"; Availability of equipment inconsistent; Lack of on-site IT support; Need for increased staff; Lack of back-up systems and equipment failures; Ongoing training, designated space and "nurse mentors" | Frustration with slow implementation, increased tasks, poor understanding about CIS, slow PDA screens and synching processes; Technical difficulties led to distrust, perception that workload increased and reduced direct patient care; Site staff member designated as IT support with mixed reception | Usability problems led to lower quality documentation; CNAs: inconsistency in new messaging led to residents not receiving necessary care; RNs: technology improved care by access to information and oversight |

|                   |                                       |                               |                                                                       |                                                                                                                               |                                                                                                                                                                                                                    |                                                                                                        |                                                                                                                       |
|-------------------|---------------------------------------|-------------------------------|-----------------------------------------------------------------------|-------------------------------------------------------------------------------------------------------------------------------|--------------------------------------------------------------------------------------------------------------------------------------------------------------------------------------------------------------------|--------------------------------------------------------------------------------------------------------|-----------------------------------------------------------------------------------------------------------------------|
| Avgar, A. (2010)  |                                       | Post-only, time not specified | 15 NH in New York City, RN/LPN/CNA, Other (e.g. social work); (N=962) | Survey (response rate 48%); Descriptive statistics and multivariate regression including nursing home quality and vendor data | Implementation costs lower in NH with greater employee satisfaction and discretion                                                                                                                                 |                                                                                                        |                                                                                                                       |
| Lapane, K. (2006) | Pharmaceutical care planning software | Post-only: time not specified | 13 NH contracting with pharmacy; Pharmacists (N=17)                   | Survey, Utilization data: frequency and tabulations                                                                           | Multiple training sessions with test usage; Adaptations to NH limitations, e.g. lack of internet connectivity; 71 % of dispensing and 40% of consultant pharmacists reported using the software most/ all the time | Technical difficulties: connectivity, synchronization, system instability-->inconsistent use of system | 23% of residents received intervention to prevent medication problem; 71% prior to mandatory 30-day medication review |

|                  |          |                                        |                                                                                     |                                                                |                                                                                                                                                                                                                                                                    |                                                                                                                                                                                                                                |                                                                                                                                                                                                                                                                                                                                                                                                                                                            |                                                                                                                                                                                                                                                      |
|------------------|----------|----------------------------------------|-------------------------------------------------------------------------------------|----------------------------------------------------------------|--------------------------------------------------------------------------------------------------------------------------------------------------------------------------------------------------------------------------------------------------------------------|--------------------------------------------------------------------------------------------------------------------------------------------------------------------------------------------------------------------------------|------------------------------------------------------------------------------------------------------------------------------------------------------------------------------------------------------------------------------------------------------------------------------------------------------------------------------------------------------------------------------------------------------------------------------------------------------------|------------------------------------------------------------------------------------------------------------------------------------------------------------------------------------------------------------------------------------------------------|
| Rantz, M. (2011) | EHR, POC | Post-only, 6-, 12-18-months, 24 months | 4 NH in U.S., Administrators, RNs, LPNs, CNAs (22 focus groups, N=110 participants) | Interviews, focus groups, direct observation; content analysis | Staff expectations unrealistic; More training and on-site support needed; Staff unclear about responsibilities; Concern over non-English speaking staff ability to use EMR; Administrators did not budget for ongoing hardware, software updates, staff IT support | Both staff and residents resistant to wearable microchip; Staff perceptions of EHR monitoring: demonstrate work vs. excess oversight; Ongoing lack of reliability in equipment and system, insufficient IT support after hours | Licensed staff: better communication with physicians as information was received more readily; CNAs: concerned increased time on documentation and managing technology reduced patient care; Staff inconsistent on timely completion of documentation; Continued paper use, double documentation, and under-utilized alerts/messaging tools; Text notes as lengthy and less flexible assessments<br>Perceived improvement in documentation at 12-24 months | Administrators and licensed staff: improved ability to trend clinical problems and manage residents, medication; Concerns documentation errors due to system problems, continued use of paper and incomplete transfer of information between the two |
|------------------|----------|----------------------------------------|-------------------------------------------------------------------------------------|----------------------------------------------------------------|--------------------------------------------------------------------------------------------------------------------------------------------------------------------------------------------------------------------------------------------------------------------|--------------------------------------------------------------------------------------------------------------------------------------------------------------------------------------------------------------------------------|------------------------------------------------------------------------------------------------------------------------------------------------------------------------------------------------------------------------------------------------------------------------------------------------------------------------------------------------------------------------------------------------------------------------------------------------------------|------------------------------------------------------------------------------------------------------------------------------------------------------------------------------------------------------------------------------------------------------|

|                          |                      |                                                                                                                                                                                              |                                                        |                                                                                                                                                                                                                                                                                                                                                                                                                                                                                                                                                                                                    |                                                                                                                                                                                                                                                                                                                                                                                                                                                                                                                                                                                           |                                                                                                                                                                                                                                                                                                                                                                                                                                                                                                                                                                               |
|--------------------------|----------------------|----------------------------------------------------------------------------------------------------------------------------------------------------------------------------------------------|--------------------------------------------------------|----------------------------------------------------------------------------------------------------------------------------------------------------------------------------------------------------------------------------------------------------------------------------------------------------------------------------------------------------------------------------------------------------------------------------------------------------------------------------------------------------------------------------------------------------------------------------------------------------|-------------------------------------------------------------------------------------------------------------------------------------------------------------------------------------------------------------------------------------------------------------------------------------------------------------------------------------------------------------------------------------------------------------------------------------------------------------------------------------------------------------------------------------------------------------------------------------------|-------------------------------------------------------------------------------------------------------------------------------------------------------------------------------------------------------------------------------------------------------------------------------------------------------------------------------------------------------------------------------------------------------------------------------------------------------------------------------------------------------------------------------------------------------------------------------|
| Schoville, R. EHR (2015) | Post-only: 2012-2013 | 3 NH in Michigan, two sites post-implementation and 1 site during, DON (Interviews, N=3), RNs/LPNs/CNAs (N=30); randomized purposeful sampling, English speaking, working 20+ hours per week | Semi-structured focus groups and individual interviews | <p>Decisions to adopt EHR at leadership level, w/o staff input; DON and staff not clear on motivations, CNAs perceive related to laws/billing;</p> <p>Training: single 4-6hr sessions for nurses, 1hr for CNAs: not tailored to staff needs, too rushed, need for ongoing training</p> <p>DON reported multiple communication strategies about new EHR, but CNAs reported limited communication</p> <p>Successful strategies:</p> <p>Vendors: close implementation support including conversion from paper and upgrading internet connectivity;</p> <p>Leadership: Prepare systems so ready to</p> | <p>DON: concerned re CNA computer skills; CNAs: want to learn new technology</p> <p>New roles: Superusers: sometimes they and staff did not know who they were, unclear how they were selected;</p> <p>"Key persons": Lead projects</p> <p>Not clear staff compensated for new roles other than for additional hours worked</p> <p>Nursing staff: limited computer literacy</p> <p>CNAs: perceived EHR as a system to enforce daily documentation with penalties; less knowledgeable about IT support available to them</p> <p>Staff: work more efficiently, improved communication ,</p> | <p>Changes in workflow processes</p> <p>Computer and system unreliable, lack of CNA access to reboot systems, user interface and functions not well fit for needs;</p> <p>Nurses: EHR efficient, thorough, allows the payor source to determine reimbursement for resident care</p> <p>CNAs: mixed on time spent on direct resident care, documentation time increased, adjusting to frequent interruptions in workflows, increased workload for tasks that required both electronic and paper documentation</p> <p>Workarounds: Reverted to paper, verbal communication;</p> |
|--------------------------|----------------------|----------------------------------------------------------------------------------------------------------------------------------------------------------------------------------------------|--------------------------------------------------------|----------------------------------------------------------------------------------------------------------------------------------------------------------------------------------------------------------------------------------------------------------------------------------------------------------------------------------------------------------------------------------------------------------------------------------------------------------------------------------------------------------------------------------------------------------------------------------------------------|-------------------------------------------------------------------------------------------------------------------------------------------------------------------------------------------------------------------------------------------------------------------------------------------------------------------------------------------------------------------------------------------------------------------------------------------------------------------------------------------------------------------------------------------------------------------------------------------|-------------------------------------------------------------------------------------------------------------------------------------------------------------------------------------------------------------------------------------------------------------------------------------------------------------------------------------------------------------------------------------------------------------------------------------------------------------------------------------------------------------------------------------------------------------------------------|

|                                                                          |                                                               |
|--------------------------------------------------------------------------|---------------------------------------------------------------|
| use when<br>introduced to staff                                          | fostered ongoing<br>teamwork                                  |
| Training:<br>Superusers                                                  | Staff not aware of<br>rewards/incentives,<br>requested raises |
| IT support: 24/7on-<br>site initially, then<br>on call, then<br>HelpDesk |                                                               |

|               |     |                            |                                                                                              |                                                                                                           |                                                                                                                       |                                                                                                                                                                                                                                                                                                |                                       |
|---------------|-----|----------------------------|----------------------------------------------------------------------------------------------|-----------------------------------------------------------------------------------------------------------|-----------------------------------------------------------------------------------------------------------------------|------------------------------------------------------------------------------------------------------------------------------------------------------------------------------------------------------------------------------------------------------------------------------------------------|---------------------------------------|
| Yu, P. (2013) | EHR | Post-only: 2009, 2010-2011 | 9 RACHs in Australia, Managers(31)RNs(15), EENs(6), PCWs (45), other staff (13), Total N=110 | Semi-structured interviews, content analysis, quantitative frequencies and tabulation of codes and themes | Insufficient support for the development of care plans; data storage problems; managers report resistance to use EHRs | 40%:inadequate functionality and poor user-interface design led to inability to input data and retrieve information; lack of electronic forms, inability to find information quickly, difficulty in generating reports; paper-based documenting preferred; 22%: increased documentation burden | Quality of documentation not improved |
|---------------|-----|----------------------------|----------------------------------------------------------------------------------------------|-----------------------------------------------------------------------------------------------------------|-----------------------------------------------------------------------------------------------------------------------|------------------------------------------------------------------------------------------------------------------------------------------------------------------------------------------------------------------------------------------------------------------------------------------------|---------------------------------------|

**Cross-sectional**

|                        |                                                                                                         |                              |                                                                                           |                                                                                            |  |                                                                                                                        |                                                                                                                                               |
|------------------------|---------------------------------------------------------------------------------------------------------|------------------------------|-------------------------------------------------------------------------------------------|--------------------------------------------------------------------------------------------|--|------------------------------------------------------------------------------------------------------------------------|-----------------------------------------------------------------------------------------------------------------------------------------------|
| Alexander, G. (2015b?) | Multiple HIT applications: EHR, CDSS, automated alerts, wireless data capture, POC, eMAR, real-time MDS | Cross-sectional: observation | 16 NH in Missouri, with low, medium and high IT (based on statewide survey); CNAs (N=213) | Focus groups (31); Survey on roles, training and employment of NAs, descriptive statistics |  | High IT: greater variety of communication strategies<br>Low IT: paper to communicate very important details or updates | High IT: enabled nursing assistants to make better clinical decisions (e.g. track and access patient needs at the point of care) and improved |
|------------------------|---------------------------------------------------------------------------------------------------------|------------------------------|-------------------------------------------------------------------------------------------|--------------------------------------------------------------------------------------------|--|------------------------------------------------------------------------------------------------------------------------|-----------------------------------------------------------------------------------------------------------------------------------------------|

workflow, care activities

Alexander, G. (2015c)

Multiple HIT applications: EHR, CDSS, automated alerts, wireless data capture, POC, eMAR, real-time MDS

Cross-sectional: observation; case studies

2 NHs in Missouri, one high, one "low" (based on a statewide survey, CNAs (N=21)

Direct observation, administrative data, Focus groups (5); social network analysis and document analysis

High IT: interactions less frequent, more variety of communication and back-up systems

Low IT: more verbal discussions about risk assessment and skin care inspection, inefficiencies due to incomplete electronic and paper documentation, having to check two systems and no backup

Less paper improves security (protection and backup hardware) HIT: better quality based on AHRQ guidelines (e.g risk reassessment and skin care inspection)



|                      |                           |                                          |                                                                                                                                                                |                                                           |                                                                                                                                                                                                                                                                                             |                                                                                                                                                                                     |                                                                                                                                              |                                                                       |
|----------------------|---------------------------|------------------------------------------|----------------------------------------------------------------------------------------------------------------------------------------------------------------|-----------------------------------------------------------|---------------------------------------------------------------------------------------------------------------------------------------------------------------------------------------------------------------------------------------------------------------------------------------------|-------------------------------------------------------------------------------------------------------------------------------------------------------------------------------------|----------------------------------------------------------------------------------------------------------------------------------------------|-----------------------------------------------------------------------|
| Alexander, G. (2009) | Multiple HIT applications | Cross-sectional: observation             | 4 Midwest NH: high IT; Non-specific: administrators and leaders in implementation                                                                              | Key informant structured interviews (4), focus groups (3) | Internet access limited to management; IT support: helpful to implementation team, maintenance staff, central integration point; use of consultants if no IT staff;                                                                                                                         | Administrators provided IT support (only one had on-site IT)                                                                                                                        | Lack of integrated product to link clinical, fiscal, and regulatory needs which reinforces silo problems                                     | IT allowed better oversight and identification of high risk residents |
| Bezboruah, K. (2014) | Multiple HIT applications | Case study; cross sectional: observation | 6 NH in Dallas/Fort Worth, Texas metro area: adopters and non-adopters, Administrators; DON, case managers, nursing staff, kitchen staff, admin interns (N=42) | Semi-structured interviews, Direct observation            | "trial and error" implementation process; Incomplete communication regarding the benefits IT; One admin noted no plan to adopt HIT beyond MDS due to costs and training personnel<br>Concerns re: older nurses who had "never worked with computers"<br>Admin have poor understanding of IT | Staff reluctant to learn: slows pace and make more mistakes, additional work hours<br>Staff "actively or passively" avoid using IT, e.g. pulling out cables and turning off systems | Nurses at one site: IT overly technical and not useful;<br>Inefficient: Doubled workload w no reduction in paper; Slow system response times |                                                                       |

|                     |     |                              |                                                                                                                           |                                        |                                                                                                                                                                                                  |                                                                       |                                                                     |
|---------------------|-----|------------------------------|---------------------------------------------------------------------------------------------------------------------------|----------------------------------------|--------------------------------------------------------------------------------------------------------------------------------------------------------------------------------------------------|-----------------------------------------------------------------------|---------------------------------------------------------------------|
| Cherry, B. (2011b?) | EHR | Cross-sectional: observation | 600 randomly selected NH in Texas; Administrators, DON (N=92)                                                             | Survey; item analysis Cronbach's alpha | Facilities with higher readiness scores on leadership and employee willingness to adopt IT have higher scores on items related to plans for implementation                                       |                                                                       |                                                                     |
| Cherry, B. (2008)   | EHR | Cross-sectional: observation | NH in Texas, users and non-users of EHRs; DONs, administrators and corporate executives, recruited from conference (N=34) | Focus groups                           | Implementation barriers: training, need for additional staff/consultants, culture change/staff resistance to change, staff lack of familiarity with computers including low CNA education levels | Perceived staff satisfaction increases due to "pride and empowerment" | Ease of access to information, staff have more time for direct care |

|                     |     |                              |                                                                                                    |                                                                                                                            |                                                                                                                                                                                      |                                                                                                                                                                                                                                                                                                                                                     |                                                                                                                                                                                                                                                                                                                                                         |                                                                                                                                                                                                                                                                                                                                                                                                               |
|---------------------|-----|------------------------------|----------------------------------------------------------------------------------------------------|----------------------------------------------------------------------------------------------------------------------------|--------------------------------------------------------------------------------------------------------------------------------------------------------------------------------------|-----------------------------------------------------------------------------------------------------------------------------------------------------------------------------------------------------------------------------------------------------------------------------------------------------------------------------------------------------|---------------------------------------------------------------------------------------------------------------------------------------------------------------------------------------------------------------------------------------------------------------------------------------------------------------------------------------------------------|---------------------------------------------------------------------------------------------------------------------------------------------------------------------------------------------------------------------------------------------------------------------------------------------------------------------------------------------------------------------------------------------------------------|
| Cherry, B. (2011c?) | EHR | Cross-sectional: observation | 10 NH in Texas, "early adopters" using EHRs at least one year; DONs, administrators, nurses, staff | Semi-structured interviews (DON, administrators), Focus groups (nurses, staff, residents and families), direct observation | Minimal CNA training needed for icon-based programs on touch screens; Request for ongoing input with IT/vendor<br><br>IT: inconsistent internet access, system downtime and glitches | Nursing supervisors: Improved staff recruitment and retention esp younger nurses; Admin: improved staff satisfaction but also frustration<br>Direct care staff: new staff quit due to "information overload", challenges with learning how to type/use computers; CNAs: positive, feel greater respect bc their work merited computer documentation | All: rapid access to information, greater legibility; Nursing supervisors; mixed on whether time spent on activities changed; Direct care staff: overall time savings, mixed on time spent on direct care, maintaining care plans, frustration with unreliable systems; CNAs: difficulty learning computers but improved 1-2 wks, system access limited | Admin: increased documentation accuracy, monitoring, and implementation of evidence-based practices; Nurses: no change in quality of care; Nursing supervisors: more thorough assessments; Direct care staff: more proactive due to alerts, better able to monitor residents' conditions; CNAs: more accurate and thorough documentation, perceived by residents and families to be "playing" on the computer |
|---------------------|-----|------------------------------|----------------------------------------------------------------------------------------------------|----------------------------------------------------------------------------------------------------------------------------|--------------------------------------------------------------------------------------------------------------------------------------------------------------------------------------|-----------------------------------------------------------------------------------------------------------------------------------------------------------------------------------------------------------------------------------------------------------------------------------------------------------------------------------------------------|---------------------------------------------------------------------------------------------------------------------------------------------------------------------------------------------------------------------------------------------------------------------------------------------------------------------------------------------------------|---------------------------------------------------------------------------------------------------------------------------------------------------------------------------------------------------------------------------------------------------------------------------------------------------------------------------------------------------------------------------------------------------------------|

|                     |     |                              |                                                                                   |                                                                                                                                                                                            |                                            |                                                                                                                   |                                                                                                                                          |
|---------------------|-----|------------------------------|-----------------------------------------------------------------------------------|--------------------------------------------------------------------------------------------------------------------------------------------------------------------------------------------|--------------------------------------------|-------------------------------------------------------------------------------------------------------------------|------------------------------------------------------------------------------------------------------------------------------------------|
| Faxvaag, A. (2011)  | EHR | Cross-sectional: observation | 29 NH, 21 hospital departments in Norway; Clinicians (NH N=239) (Hospitals N=206) | Survey (NH: Response rate 41%; Hospital response rate:15%): frequencies and tabulations                                                                                                    |                                            | Delays and disruptions in patient care, time consuming<br>Workarounds: verbal communication because more reliable | Issues in log-in procedures: Failure to look into the patient's EHR in advance of providing care to the patient, incorrect documentation |
| Filipova, A. (2013) | EHR | Cross-sectional: observation | NH in Midwest, Administrators (N=156)                                             | Survey (Complete response rate 39%): descriptive statistics, factor analysis of constructs, Pearson Chi-square for associations with use of HIT automation and perceived benefits/barriers | Costs (not training/staff) as main barrier | HIT improves access to information; all facilities continued use of paper                                         | HIT improves monitoring of patient care, oversight                                                                                       |

Fossum, M.  
(2011)

Cross-sectional:  
observation

4 NH in  
Norway, RNs,  
CNAs, Special  
Needs Educator  
(Focus groups  
(N=25))  
Usability  
evaluation:  
N=5)

Focus groups (4);  
Direct observation  
for usability  
evaluation

Barriers: Training  
not made available  
to all and was  
optional; Lack of  
information about  
implementation;  
Lack of computer  
skills and resistance  
to using computers

Usability: overall  
high satisfaction  
scores in evaluation  
unlike focus  
groups; other  
challenges: lack of  
workstations;  
functions not fit to  
tasks; Poor  
integration of  
systems; Poor  
design of user  
interface

Concerns with  
patient security  
because of poor  
interface of CDSS  
with EHR

|                    |                           |                               |                                                                                                                                                                                                                                                                                                   |                                                                                                                                                       |                                                                                                                                                                                                                                                                                                                                                                                                                                                 |                                                 |                                                                                                                                                                                                                                                                                                |                                                                                                                                                                           |
|--------------------|---------------------------|-------------------------------|---------------------------------------------------------------------------------------------------------------------------------------------------------------------------------------------------------------------------------------------------------------------------------------------------|-------------------------------------------------------------------------------------------------------------------------------------------------------|-------------------------------------------------------------------------------------------------------------------------------------------------------------------------------------------------------------------------------------------------------------------------------------------------------------------------------------------------------------------------------------------------------------------------------------------------|-------------------------------------------------|------------------------------------------------------------------------------------------------------------------------------------------------------------------------------------------------------------------------------------------------------------------------------------------------|---------------------------------------------------------------------------------------------------------------------------------------------------------------------------|
| Hudak.S.<br>(2007) | Multiple HIT applications | Cross-sectional: observation: | LTC facilities in California: SNF, assisted living, and residential care facilities for the elderly; Administrators, DON, care managers (Survey: N=103; response rate SNF: 47%; ALF: 21%); Focus groups: facilities without HIT; Interviews: early adopters (3), stakeholders and HIT experts (9) | Survey: response rate: SNF: 47%; ALF: 21%; Focus groups, semi-structured interviews                                                                   | Staff lack computer skills and fear technology; lack of hardware and IT support; challenges with English as a second language; No strategic planning; Leadership: Lack of knowledge on HIT; Underestimate change management needs; Account for training/support staff- facilities don't usually have manpower to do this themselves<br><br>Success strategies: Implementation systematic, roll-out not all at once<br>Ongoing training for CNAs | Recognize leadership buy-in and expect turnover | HIT too complicated, not flexible, not easy to learn or use; modification too costly or difficult; Poor integration of systems makes work flow too tedious and complex; Perceived benefits in reducing paper and automated charting<br><br>Recommend redesign workflow prior to implementation | Administrators: Less likely to perceive benefit, believe limited evidence for benefit; Providers: establishing uniform data, decreasing errors, and monitoring compliance |
| Liu, D.<br>(2009)  | MDS                       | Cross-sectional: observation  | NH in U.S, Administrators, RN/LPN/SNA (N=2397)                                                                                                                                                                                                                                                    | Survey, CMS data; Multivariate regression on use of IT, quality and nurse staffing; mediation tests of IT in the staffing levels-outcome relationship |                                                                                                                                                                                                                                                                                                                                                                                                                                                 |                                                 |                                                                                                                                                                                                                                                                                                | HIT mediates and moderates association between nurse staffing and quality of care                                                                                         |

|                   |     |                              |                                                                                      |                                                                                                   |                                                                                                                                                                                                                                                                                                                                                            |                                                             |                                                                                                                                                                                                                                                                                                                                         |                                                                                                                                                                              |
|-------------------|-----|------------------------------|--------------------------------------------------------------------------------------|---------------------------------------------------------------------------------------------------|------------------------------------------------------------------------------------------------------------------------------------------------------------------------------------------------------------------------------------------------------------------------------------------------------------------------------------------------------------|-------------------------------------------------------------|-----------------------------------------------------------------------------------------------------------------------------------------------------------------------------------------------------------------------------------------------------------------------------------------------------------------------------------------|------------------------------------------------------------------------------------------------------------------------------------------------------------------------------|
| Meehan, R. (2015) | EHR | Cross-sectional: observation | 1 LTPAC (long-term post-acute care) in Midwest; Direct care nurses: RNs/ LPNs (N=20) | Semi-structured interviews; Content analysis and descriptive statistics: frequencies, tabulations | <p>Most respondents familiar with computers outside of work;</p> <p>Training: one day on site, sufficient at the time but staff wanted ongoing training to navigate EHR</p> <p>No on-site IT; Central IT Helpdesk available 24/7 but some delays in response</p> <p>Staff members asked to help were frustrated that colleagues did not use IT support</p> | More challenges with intermittent staff and after vacations | <p>Majority reported HIT as useful and easy to use, satisfied with system, improved access to information, legibility and visibility;</p> <p>Challenges: lack of fit for functions; lack of integration with hospital communication; more time spent on EHR when unforeseen incidents occurred; double systems, lack of integration</p> | <p>Majority of staff agree that EHR is better than paper records for improving quality of care</p> <p>Lack of flexibility/functionality negatively impact patient safety</p> |
|-------------------|-----|------------------------------|--------------------------------------------------------------------------------------|---------------------------------------------------------------------------------------------------|------------------------------------------------------------------------------------------------------------------------------------------------------------------------------------------------------------------------------------------------------------------------------------------------------------------------------------------------------------|-------------------------------------------------------------|-----------------------------------------------------------------------------------------------------------------------------------------------------------------------------------------------------------------------------------------------------------------------------------------------------------------------------------------|------------------------------------------------------------------------------------------------------------------------------------------------------------------------------|

|                    |     |                                 |                                                    |                                                                                              |                                                                     |                                                                                                                                                                                                                                                                                                                                                                                |
|--------------------|-----|---------------------------------|----------------------------------------------------|----------------------------------------------------------------------------------------------|---------------------------------------------------------------------|--------------------------------------------------------------------------------------------------------------------------------------------------------------------------------------------------------------------------------------------------------------------------------------------------------------------------------------------------------------------------------|
| Qian, S.<br>(2014) | EHR | Cross-sectional:<br>observation | 1 RACH in<br>Australia;<br>RNs/EENs/PC<br>Ws (N=?) | Direct observation,<br>informal<br>conversation, field<br>notes: workflow<br>process mapping | Training: 30-min<br>one-on-one, 3 mos<br>prior to<br>implementation | <p>Many functional deficiencies: lack of: tools to remind nurse about wound chart, functions to carry out work tasks, information about resident care needs, point-of-care system:</p> <p>Workarounds:<br/>printed wound care charts from EHR to create wound care book, then re-entered into EHR (plus separate paper note) •nurses relied on paper, verbal communication</p> |
|--------------------|-----|---------------------------------|----------------------------------------------------|----------------------------------------------------------------------------------------------|---------------------------------------------------------------------|--------------------------------------------------------------------------------------------------------------------------------------------------------------------------------------------------------------------------------------------------------------------------------------------------------------------------------------------------------------------------------|



|                        |                               |                                 |                                                                                                                                                                       |                                                                                                                                                                                                                                        |                                                                                                                                                                                                                                                                                                       |                                                                                                                                                                                                                                                                                 |
|------------------------|-------------------------------|---------------------------------|-----------------------------------------------------------------------------------------------------------------------------------------------------------------------|----------------------------------------------------------------------------------------------------------------------------------------------------------------------------------------------------------------------------------------|-------------------------------------------------------------------------------------------------------------------------------------------------------------------------------------------------------------------------------------------------------------------------------------------------------|---------------------------------------------------------------------------------------------------------------------------------------------------------------------------------------------------------------------------------------------------------------------------------|
| Vanneste, D.<br>(2013) | Web-based<br>assessment tools | Cross-sectional:<br>observation | NH, home care,<br>hospitals in<br>Belgium;<br>Nurses, PT, OT,<br>social work,<br>podiatrists,<br>physicians,<br>psychologists,<br>dentists,<br>pharmacists<br>(N=282) | Survey: asses<br>anxiety, self-<br>efficacy, and<br>attitudes towards<br>using technology<br>(ATUT);<br>multivariate<br>structural equation<br>modeling to<br>estimate influences<br>on intent to use<br>HIT, (response rate<br>42.7%) | "Facilitating<br>conditions": having<br>resources and<br>knowledge required<br>to use the system,<br>availability of<br>assistance, and<br>compatibility with<br>existing system;<br>Self-efficacy to<br>complete new tasks,<br>having someone to<br>call for help, and<br>having time to<br>practice | Performance<br>expectancy (e.g.<br>belief that system<br>would improve<br>ability to do job),<br>effort expectancy<br>(easy to use system)<br>and social influence<br>(perceived support<br>from organization)<br>do not have a<br>significant<br>influence on intent<br>to use |
| Wang. T.<br>(2012)     | Multiple HIT<br>applications  | Cross-sectional                 | NH in Texas,<br>Administrators<br>(N=913)                                                                                                                             | Survey (response<br>rate 15%):<br>Descriptive<br>statistics                                                                                                                                                                            | Multiple barriers to<br>implementation:<br>Lack of time (29%)<br>Lack of technical<br>support staff (21%)<br>Lack of HIT<br>knowledge (12%)<br>Fear of technology<br>(8%)<br>Unclear on benefits<br>of EHR (15%)                                                                                      | Concerns on<br>reductions in<br>productivity: EHRs<br>not user friendly,<br>too complex,<br>products do not<br>meet needs                                                                                                                                                       |

|               |                            |                                                                              |                                                                                                                                      |                                                      |                                                                                                                             |                                                                                                                          |
|---------------|----------------------------|------------------------------------------------------------------------------|--------------------------------------------------------------------------------------------------------------------------------------|------------------------------------------------------|-----------------------------------------------------------------------------------------------------------------------------|--------------------------------------------------------------------------------------------------------------------------|
| Yu, P. (2006) | EHR, electronic care plans | Cross-sectional: observation; Nurse managers, EENs/PCWs/AINs, clerks (N=159) | 13 RACH in Australia, 11 electronic care plans, no other HIT functions, PCW/AINs did not have access to computers in any study sites | Survey (Response rate 39.8%): Descriptive statistics | Majority: neutral with current paper-based practices; willing to use if easy to use and reduces time spent on documentation | 89% report trust in computer systems and support introduction of electronic nursing documentation to better manage care; |
|---------------|----------------------------|------------------------------------------------------------------------------|--------------------------------------------------------------------------------------------------------------------------------------|------------------------------------------------------|-----------------------------------------------------------------------------------------------------------------------------|--------------------------------------------------------------------------------------------------------------------------|

Health Information Technologies: EHR: Electronic health record; HIE: Health information exchange; eMAR: Electronic Medication Administration Record; CDSS: Clinical Decision Support System; POC: Point-of-Care documentation system; CPOE: Computerized order entry; MDS: Electronic Minimum Data Set entry system

Long-Term Care Facilities: NH: Nursing Homes, RACH: Residential Aged Care Home

Workforce Roles: Personal Care Worker (PCW), Certified Nursing Assistant (CNA), Assistants in Nursing (AIN), Licensed Vocational Nurse (LVN), Licensed Practical Nurse (LPN), Enrolled Employed Nurse (EEN), Registered Nurse (RN), Director of Nursing (DON)

## II. Key informant interviews and focus groups:

**Table 2. Characteristics of participants and nursing home settings**

|                  |                                           | <b>Number</b> |
|------------------|-------------------------------------------|---------------|
| <b>Role</b>      | Administrator                             | 2             |
|                  | Director of Nursing/Chief Nursing Officer | 2             |
|                  | Director of Clinical Specialist           | 1             |
|                  | Staff or Charge nurse                     | 5             |
|                  | Staff Development Coordinator             | 1             |
|                  | Infection Control Nurse                   | 1             |
|                  | Certified Nursing Assistant (CNA)         | 3             |
| <b>Type</b>      | Free-standing                             | 11            |
|                  | Free-standing with hospital affiliation   | 1             |
| <b>Ownership</b> | For-profit                                | 9             |
|                  | Non-profit                                | 3             |
| <b>Setting</b>   | Rural                                     | 2             |
|                  | Suburban                                  | 4             |
|                  | Urban                                     | 5             |

## **Interview Guides**

### **INTERVIEW GUIDE: Aide Version**

#### **STAFF POSITION**

1. Are you: FT, PT, PerDiem, Agency
2. How long have you worked here?
3. Tell me what you know about the history of the implementation of Health Information Technology in your facility?
4. What forms of Health Information Technology are used in your facility? (Check off: AM/PM Care, BMs and % intake of meals documentation)

#### ***Quality***

On a scale of 1-5, how would you rate the current quality of the following factors associated with Health Information Technology at your facility?

1. Legibility
2. Provider (MD/NP/PA) Communication
3. Accessibility
4. Usability
5. Ease

#### ***Implementation***

1. What kind of training did you receive when HIT was introduced? (Classroom, preceptor, simulation, etc)
2. Tell me about the implementation process? Duration of training? Who led the program (RN, IT, etc.)?
3. How did the training program prepare you for the EHR system? Please describe.

#### **TIME/EFFICIENCY**

1. What percentage of your shift is spent using (health) technology?
2. How has your workflow benefited or been negatively impacted from introducing HIT? In term of quality of care? And productivity?
3. What kind of workarounds do you currently do to “override” the HIT system in order to get your work completed?
4. What HIT differences have you noticed between facilities?

#### **STAFFING**

1. Have you noticed any turnover as a result of HIT introduction? Please describe.

2. Have you noticed any changes in roles as a result of HIT introduction? Please describe.

#### STAFF SUPPORT

1. Do you have a FT IT support? Part time? Consultant? Central Help Desk?
2. Is there a wait time when support is needed? If so, how long on average?
3. Do you have 24-hour access to support?
4. How are you notified of any changes/modifications?
5. How are you trained when any changes to the software occurs?

## **INTERVIEW Guide: RN/LVN/Administrator Version**

### ***STAFF POSITION***

1. What is your title? (RN, LVN/LPN, CNA, MD/NP/PA, PT/OT/ST, SW, RPh, Administrator, DON, Nurse Manager, MDS nurse, Other)
2. Are you: FT, PT, PerDiem, Agency
3. How long have you worked here?
4. Tell me what you know about the history of the implementation of Health Information Technology in your facility?
5. What forms of Health Information Technology are used in your facility? (Check off: EHR, MDS, IR/RM (same or separate system), CPOE, MAR, Treatment Record, Restorative Care, AM/PM Care, BMs and % intake of meals documentation)

### **QUALITY**

1. On a scale of 1-5, how would you rate the current quality of the following factors associated with Health Information Technology at your facility?
  6. Legibility
  7. Provider (MD/NP/PA) Communication
  8. Accessibility
  9. Usability
  10. Ease

### ***Implementation***

1. What kind of training did you receive when HIT was introduced? (Classroom, preceptor, simulation, etc)
2. Tell me about the implementation process? Duration of training? Who led the program (RN, IT, etc.)?
3. How did the training program prepare you for the EHR system? Please describe.
4. How did the nurses' years of nursing experience affect their ability to use technology?

### **TIME/EFFICIENCY**

1. What percentage of your time is spent on using HIT?
2. Are you able to access HIT off site?
3. How has your work-flow benefited from introducing HIT? In term of quality of care? And productivity?
4. How has your work-flow been negatively impacted after introducing HIT? What challenges have you faced? In term of quality of care? And productivity?

5. What kind of work arounds do you currently do to “override” the HIT system in order to get your work completed?
6. Does your EHR system enable communication between different types of providers in your facility- e.g. nursing and medical, nursing and physical therapy? If so, how has this affected workflow and communication? If not, what are the barriers?
7. What HIT differences have you noticed between facilities?

#### STAFFING

1. Have you noticed any turnover as a result of HIT introduction? Please describe.
2. Have you noticed any changes in staffing models (i.e team composition, how teams work together) as a result of HIT introduction?
3. Have you noticed any changes in roles as a result of HIT introduction? Please describe.

#### CARE TRANSITIONS

1. How do you use HIT when a resident is admitted, transferred to the ED, re-admitted/returned from the hospital, specialists appointments/consultants?
2. Do you receive paper or electronic copies of resident information when there is a care transition?
3. Is the handoff between external care providers done: verbally, on paper, electronically, in person, there is no handoff?

#### STAFF SUPPORT

1. Do you have a FT IT support? Part time? Consultant? Central Help Desk?
2. Is there a wait time when support is needed? If so, how long on average?
3. What support was provided to nurses who were challenged by the new technology?
4. Do you have 24-hour access to support?
5. How are you notified of any changes/modifications?
6. How are you trained when any changes to the software occurs?
